# Supplementary material
Source: publisher figshare collection journal article supplement (https://frontiersin.figshare.com/ndownloader/files/26650319)

**Supplementary Figure S2**

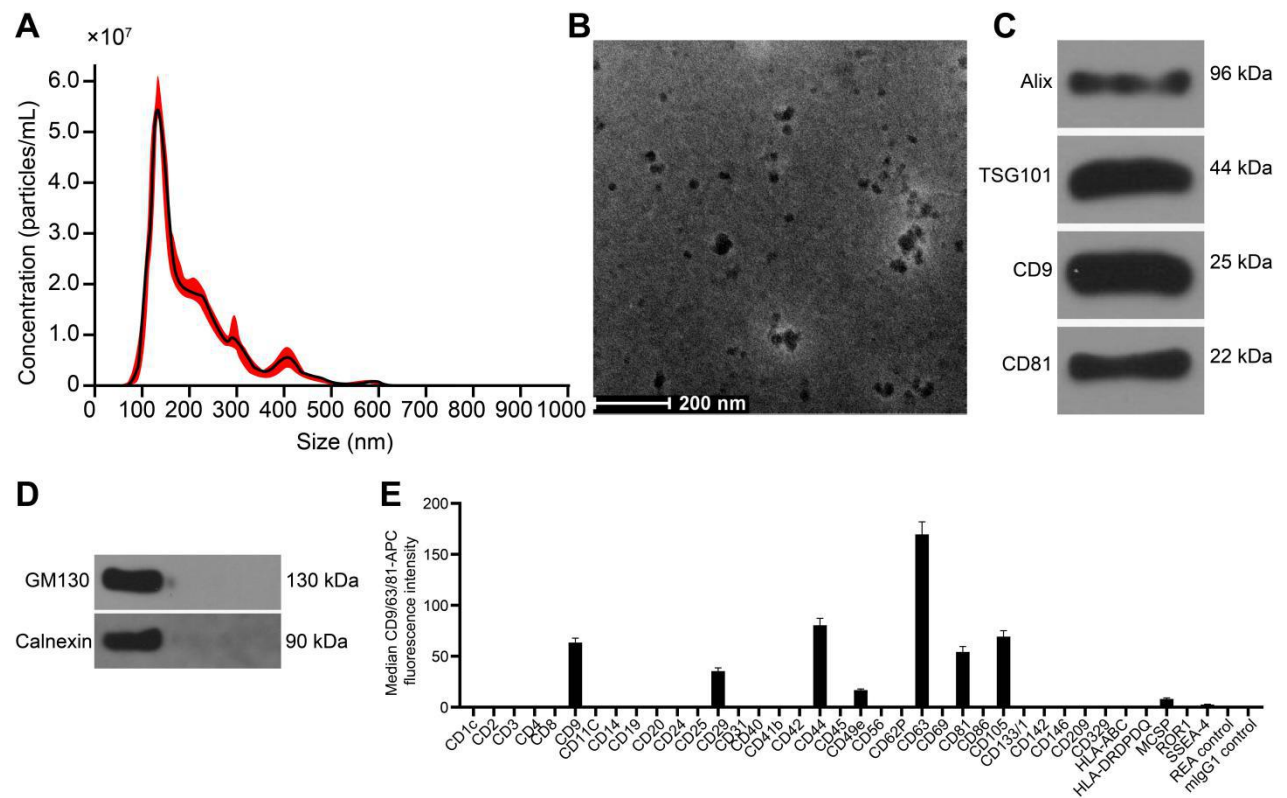

Supplement: Supplementary file [file 26650319]
